# Supplementary material
Source: ML conference proceedings conference paper supplement (https://proceedings.neurips.cc/paper_files/paper/2018/hash/dea9ddb25cbf2352cf4dec30222a02a5-Abstract.html)
Supplement: Supplementary file [file dea9ddb25cbf2352cf4dec30222a02a5-Supplemental.zip]

## A Proofs of Theorem 1 and Corollary 1

### A.1 Proof of Theorem 1

The proof is based on a variant of the Le Cam's method in Theorem 3 in [26]. Our major technical developments lie in properly choosing two hypothesis distributions as well as a neural network, and then lower-bounding the difference of the expectation of the chosen neural network function between the two distributions. We first present the Le Cam's method (Theorem 3 in [26]).

**Lemma 1** (Le Cam's method). *Let  $F : \Theta \rightarrow \mathbb{R}$  be a functional defined on a space  $\Theta$  and  $P_\Theta = \{P_\theta : \theta \in \Theta\}$  be a set of probability measures. The data samples  $\mathcal{D}_n$  are distributed according to an unknown element  $P_\theta \in P_\Theta$ . Assume that there exist  $\theta_1, \theta_2 \in \Theta$  such that  $|F(\theta_1) - F(\theta_2)| \geq 2\beta > 0$  and  $\text{KL}(P_{\theta_2} \| P_{\theta_1}) \leq \alpha < \infty$ . Then,*

$$\inf_{\hat{F}_n} \sup_{\theta \in \Theta} P_\theta \left\{ \left| \hat{F}_n(\mathcal{D}_n) - F(\theta) \right| \geq \beta \right\} \geq \max \left\{ \frac{1}{4} e^{-\alpha}, \frac{1 - \sqrt{\alpha/2}}{2} \right\}, \quad (21)$$

where the Kullback-Leibler divergence  $\text{KL}(P_{\theta_2} \| P_{\theta_1}) := \int \log \left( \frac{dP_{\theta_2}}{dP_{\theta_1}} \right) dP_{\theta_2}$  and  $\hat{F}_n(\mathcal{D}_n)$  is an estimator of  $F(\theta)$  based on the random samples  $\mathcal{D}_n$ .

We first consider the case when the parameter set is  $\mathcal{W}_F$ , and then adapt the proof to the parameter set  $\mathcal{W}_{1,\infty}$ . In addition, we suppose  $m \geq n$ , and the case  $m < n$  can be proved in the same way.

**Case 1: parameter set  $\mathcal{W}_F$ .** Recall from (5) that  $\mathcal{W}_F$  is defined by

$$\mathcal{W}_F := \prod_{i=1}^{d-1} \left\{ \mathbf{W}_i \in \mathbb{R}^{n_i \times m_i} : \|\mathbf{W}_i\|_F \leq M_F(i) \right\} \times \left\{ \mathbf{W}_d \in \mathbb{R}^{n_d} : \|\mathbf{W}_d\| \leq M_F(d) \right\}.$$

Assign each distribution  $\mu \in \mathcal{P}_{\text{ub}}$  with a unique index  $\tilde{\theta}_\mu$  and define an index set  $\tilde{\Theta} := \{\tilde{\theta}_\mu : \mu \in \mathcal{P}_{\text{ub}}\}$ . To cast the form (9) in Theorem 1 to the context of Lemma 1, we let  $\Theta = \tilde{\Theta} \times \tilde{\Theta}$ ,  $F(\theta) = d_{\mathcal{F}_{nn}}(\mu, \nu)$  and  $P_\theta := \mathbb{P} = \mu^n \times \nu^m$  in (21) for  $\theta = (\tilde{\theta}_\mu, \tilde{\theta}_\nu)$ , where  $\tilde{\theta}_\mu$  and  $\tilde{\theta}_\nu$  are the indices of  $\mu, \nu \in \mathcal{P}_{\text{ub}}$  and  $\mathbb{P} = \mu^n \times \nu^m$  is the probability measure with the respect to the random samples  $\{\mathbf{x}_i\}_{i=1}^n \stackrel{i.i.d.}{\sim} \mu$  and  $\{\mathbf{y}_i\}_{i=1}^m \stackrel{i.i.d.}{\sim} \nu$ .

To apply Lemma 1, we need to find two pairs of distributions  $(\mu_1, \nu_1), (\mu_2, \nu_2) \in \mathcal{P}_{\text{ub}}$  and  $\alpha, \beta$  such that  $|d_{\mathcal{F}_{nn}}(\mu_1, \nu_1) - d_{\mathcal{F}_{nn}}(\mu_2, \nu_2)| \geq 2\beta$  and  $\text{KL}(\mathbb{P}_2 \| \mathbb{P}_1) \leq \alpha$ , where  $\mathbb{P}_1 = \mu_1^n \times \nu_1^m$  and  $\mathbb{P}_2 = \mu_2^n \times \nu_2^m$ . Specifically, we choose the following four Gaussian distributions

$$\mu_1 = G(\mathbf{u}_1, \tau^2 \mathbf{I}_h), \quad \nu_1 = G(\mathbf{u}_2, \tau^2 \mathbf{I}_h), \quad \mu_2 = \nu_2 = G(0, \tau^2 \mathbf{I}_h). \quad (22)$$

where

$$\|\mathbf{u}_1\|^2 = \frac{\Gamma_{\text{ub}}^2}{3} \left( \frac{1}{n} + \frac{1}{m} \right), \quad \|\mathbf{u}_2\|^2 = \frac{\Gamma_{\text{ub}}^2}{3m}, \quad \mathbf{u}_1^T \mathbf{u}_2 = \|\mathbf{u}_2\|^2, \quad \tau^2 = \frac{\Gamma_{\text{ub}}^2}{3} \left( 2 + \frac{n}{m} \right) \quad (23)$$

with  $\Gamma_{\text{ub}}$  defined as the upper bound of the mean and variance parameter of the unbounded-support sub-Gaussian distributions in  $\mathcal{P}_{\text{ub}}$  (see (8) for the definition). Clearly, (23) implies that  $\|\mathbf{u}_1 - \mathbf{u}_2\|^2 = \Gamma_{\text{ub}}^2/3n$  and  $0 \leq \tau, \|\mathbf{u}_1\|, \|\mathbf{u}_2\| \leq \Gamma_{\text{ub}}$ .

Since  $\mu_2 = \nu_2$ ,  $d_{\mathcal{F}_{nn}}(\mu_2, \nu_2) = 0$ , and hence

$$|d_{\mathcal{F}_{nn}}(\mu_1, \nu_1) - d_{\mathcal{F}_{nn}}(\mu_2, \nu_2)| = d_{\mathcal{F}_{nn}}(\mu_1, \nu_1) = \sup_{f \in \mathcal{F}_{nn}} |\mathbb{E}_{\mathbf{x} \sim \mu_1} f(\mathbf{x}) - \mathbb{E}_{\mathbf{x} \sim \nu_1} f(\mathbf{x})|. \quad (24)$$

To lower-bound (24), we choose the weights in  $\tilde{f}(\mathbf{x}) = \tilde{\mathbf{w}}_d^T \sigma_{d-1}(\tilde{\mathbf{W}}_{d-1} \sigma_{d-2}(\cdots \sigma_1(\tilde{\mathbf{W}}_1 \mathbf{x}))) \in \mathcal{F}_{nn}$  as follows:

1.  $\tilde{\mathbf{w}}_d(1) = M_F(d)$ ,  $\tilde{\mathbf{w}}_d(i) = 0$  for  $i = 2, 3, \dots, n_d$ ,
2. For  $i = 2, \dots, d-1$ ,  $\tilde{\mathbf{W}}_i(1, 1) = \Omega(i)$ ,  $\tilde{\mathbf{W}}_i(s, t) = 0$  for  $(s, t) \neq (1, 1)$ ,
3.  $\|\tilde{\mathbf{W}}_1(1)\| = \mathbf{w}_1 = M_F(1)(\mathbf{u}_1 - \mathbf{u}_2)/\|\mathbf{u}_1 - \mathbf{u}_2\|$ ,  $\tilde{\mathbf{W}}_1(s) = \mathbf{0}$  for  $2 \leq s \leq n_1$ , (25)

where  $\tilde{\mathbf{w}}_d(i)$  refers to the  $i^{th}$  coordinate of  $\tilde{\mathbf{w}}_d$ ,  $\tilde{\mathbf{W}}_i(s, t)$  denotes the  $(s, t)^{th}$  entry of  $\tilde{\mathbf{W}}$ ,  $\tilde{\mathbf{W}}_1(s)$  is the  $s^{th}$  column vector of  $\tilde{\mathbf{W}}_1^T$  and  $\Omega(i)$  is defined in (11). Then, corresponding to the above parameters, we have

$$\tilde{f}(\mathbf{x}) = M_F(d)\sigma_{d-1}(\Omega(d-1)\sigma_{d-2}\cdots\Omega(2)\sigma_1(\mathbf{w}_1^T\mathbf{x})). \quad (26)$$

Combining (24) and (26) yields

$$\begin{aligned} |d_{\mathcal{F}_{nn}}(\mu_1, \nu_1) - d_{\mathcal{F}_{nn}}(\mu_2, \nu_2)| &= \sup_{f \in \mathcal{F}_{nn}} |\mathbb{E}_{\mathbf{x} \sim \mu_1} f(\mathbf{x}) - \mathbb{E}_{\mathbf{x} \sim \nu_1} f(\mathbf{x})| \\ &\geq \left| \mathbb{E}_{\mathbf{x} \sim \mu_1} \tilde{f}(\mathbf{x}) - \mathbb{E}_{\mathbf{x} \sim \nu_1} \tilde{f}(\mathbf{x}) \right|. \end{aligned} \quad (27)$$

Due to the definitions of  $\mu_1$  in (22), for  $\mathbf{x} \sim \mu_1$ , we have that  $\mathbf{w}_1^T \mathbf{x} \sim G(\mathbf{w}_1^T \mathbf{u}_1, \|\mathbf{w}_1\|^2 \tau^2)$ . Let  $x = \mathbf{w}_1^T \mathbf{x} \in \mathbb{R}$  and  $\varphi(x; u, \tau^2)$  be the probability density of the Gaussian distribution with mean  $u$  and variance  $\tau^2$ . Then, we have

$$\begin{aligned} \mathbb{E}_{\mathbf{x} \sim \mu_1} \tilde{f}(\mathbf{x}) &= \int_x M_F(d)\sigma_{d-1}(\Omega(d-1)\sigma_{d-2}\cdots\Omega(2)\sigma_1(x)) \varphi(x; \mathbf{w}_1^T \mathbf{u}_1, \|\mathbf{w}_1\|^2 \tau^2) dx \\ &= \int_x M_F(d)\sigma_{d-1}(\Omega(d-1)\sigma_{d-2}\cdots\sigma_1(x + \mathbf{w}_1^T \mathbf{u}_1)) \varphi(x; 0, \|\mathbf{w}_1\|^2 \tau^2) dx. \end{aligned} \quad (28)$$

Similarly, we have

$$\mathbb{E}_{\mathbf{x} \sim \nu_1} \tilde{f}(\mathbf{x}) = \int_x M_F(d)\sigma_{d-1}(\Omega(d-1)\sigma_{d-2}\cdots\Omega(2)\sigma_1(x)) \varphi(x; 0, \|\mathbf{w}_1\|^2 \tau^2) dx,$$

which, in conjunction with (27) and (28), yields

$$\begin{aligned} |d_{\mathcal{F}_{nn}}(\mu_1, \nu_1) - d_{\mathcal{F}_{nn}}(\mu_2, \nu_2)| &\geq \mathbb{E}_{\mathbf{x} \sim \mu_1} \tilde{f}(\mathbf{x}) - \mathbb{E}_{\mathbf{x} \sim \nu_1} \tilde{f}(\mathbf{x}) \\ &= \int_x \underbrace{(M_F(d)\sigma_{d-1}(\cdots\sigma_1(x + \mathbf{w}_1^T \mathbf{u}_1)) - M_F(d)\sigma_{d-1}(\cdots\sigma_1(x)))}_{\Delta(x)} \varphi(x; 0, \|\mathbf{w}_1\|^2 \tau^2) dx. \end{aligned} \quad (29)$$

Following from the definitions of  $\mathbf{u}_1$  and  $\mathbf{u}_2$  in (23), we have

$$\mathbf{w}_1^T \mathbf{u}_1 \stackrel{(i)}{\geq} \mathbf{w}_1^T \mathbf{u}_2 \stackrel{(ii)}{=} 0, \quad (30)$$

where (i) follows from the fact that  $\mathbf{w}_1^T(\mathbf{u}_1 - \mathbf{u}_2) = M_F(1)\|\mathbf{u}_1 - \mathbf{u}_2\| \geq 0$  and (ii) follows because  $\mathbf{u}_1^T \mathbf{u}_2 = \|\mathbf{u}_2\|^2$ . Recalling that each  $\Omega(i) \geq 0$  and each  $\sigma_i(\cdot)$  is non-decreasing, and using (30) that  $\mathbf{w}_1^T \mathbf{u}_1 \geq 0$ , we have  $\Delta(x) \geq 0$  for all  $x \in \mathbb{R}$ . Hence, (29) can be further lower-bounded by

$$\begin{aligned} |d_{\mathcal{F}_{nn}}(\mu_1, \nu_1) - d_{\mathcal{F}_{nn}}(\mu_2, \nu_2)| &\geq \int_x \Delta(x) \varphi(x; 0, \|\mathbf{w}_1\|^2 \tau^2) dx \\ &\geq \int_0^{\frac{q(1)}{2}} \Delta(x) \varphi(x; 0, \|\mathbf{w}_1\|^2 \tau^2) dx. \end{aligned} \quad (31)$$

where  $q(1)$  is defined in Assumption 2. Next, we develop a lower bound on the quantity  $\Delta(x)$ .

**Lemma 2.** For  $0 \leq x \leq q(1)/2$ , we have

$$\Delta(x) \geq \frac{M_F(1)M_F(d)\Gamma_{\text{uB}}}{\sqrt{3n}} \prod_{i=2}^{d-1} \Omega(i) \prod_{i=1}^{d-1} Q_\sigma(i),$$

where  $Q_\sigma(i), i = 1, 2, \dots, d-1$  are defined in Assumption 2.

*Proof.* Following from the definitions of  $\mathbf{u}_1$  and  $\mathbf{u}_2$  in (23), we have

$$\mathbf{w}_1^T \mathbf{u}_1 \stackrel{(i)}{\leq} \frac{M_F(1)\Gamma_{\text{uB}}}{\sqrt{3}} \sqrt{\frac{1}{n} + \frac{1}{m}} \stackrel{(ii)}{\leq} \frac{q(1)}{2} \quad (32)$$

where (i) follows from the inequality that  $\|\mathbf{w}_1^T \mathbf{u}_1\| \leq \|\mathbf{w}_1\| \|\mathbf{u}_1\| = M_F(1) \|\mathbf{u}_1\|$  and (ii) follows from the assumption of Theorem 1 that  $\sqrt{m^{-1} + n^{-1}} < \sqrt{3}q(1)/(2M_F(1)\Gamma_{\text{uB}})$ . Based on (32) that  $\mathbf{w}_1^T \mathbf{u}_1 \leq q(1)/2$ , we have, for any  $0 \leq x \leq q(1)/2$ ,

$$0 \leq x + \mathbf{w}_1^T \mathbf{u}_1 \leq q(1), \quad 0 \leq x < q(1)$$

which, using the definition of  $\Omega(i)$  in (11) and letting  $\Omega(d) = M_F(d)$ , yields that, for  $i = 2, 3, \dots, d$

$$0 < \Omega(i)\sigma_{i-1}(\dots\sigma_1(x)), \quad \Omega(i)\sigma_{i-1}(\dots\sigma_1(x + \mathbf{w}_1^T \mathbf{u}_1)) \leq \Omega(i)\sigma_{i-1}(\dots\sigma_1(q(1))) \leq q(i).$$

Then, further by Assumption 2, we obtain

$$\begin{aligned} \Delta(x) &\geq M_F(d) (\sigma_{d-1}(\dots\sigma_1(x + \tilde{\mathbf{w}}_1^T \mathbf{u}_1)) - \sigma_{d-1}(\dots\sigma_1(x))) \\ &\geq M_F(d) Q_\sigma(d-1) \Omega(d-1) (\sigma_{d-2}(\dots\sigma_1(x + \tilde{\mathbf{w}}_1^T \mathbf{u}_1)) - \sigma_{d-2}(\dots\sigma_1(x))). \end{aligned} \quad (33)$$

Repeating the step (33) for  $d-1$  times, and using (30) that  $\mathbf{w}_1^T \mathbf{u}_2 = 0$ , we have

$$\begin{aligned} \Delta(x) &\geq \mathbf{w}_1^T \mathbf{u}_1 M_F(d) \prod_{i=2}^{d-1} \Omega(i) \prod_{i=1}^{d-1} Q_\sigma(i) = \mathbf{w}_1^T (\mathbf{u}_1 - \mathbf{u}_2) M_F(d) \prod_{i=2}^{d-1} \Omega(i) \prod_{i=1}^{d-1} Q_\sigma(i) \\ &= M_F(1) M_F(d) \|\mathbf{u}_1 - \mathbf{u}_2\| \prod_{i=2}^{d-1} \Omega(i) \prod_{i=1}^{d-1} Q_\sigma(i) = \frac{M_F(1) M_F(d) \Gamma_{\text{uB}}}{\sqrt{3n}} \prod_{i=2}^{d-1} \Omega(i) \prod_{i=1}^{d-1} Q_\sigma(i), \end{aligned}$$

which finishes the proof of Lemma 2.  $\square$

Combining (31) and Lemma 2, we obtain

$$\begin{aligned} &|d_{\mathcal{F}_{nn}}(\mu_1, \nu_1) - d_{\mathcal{F}_{nn}}(\mu_2, \nu_2)| \\ &\geq \frac{M_F(1) M_F(d) \Gamma_{\text{uB}}}{\sqrt{3n}} \prod_{i=2}^{d-1} \Omega(i) \prod_{i=1}^{d-1} Q_\sigma(i) \int_0^{\frac{q(1)}{2}} \varphi(x | 0, \|\mathbf{w}_1\|^2 \tau^2) dx \\ &= \frac{M_F(1) M_F(d) \Gamma_{\text{uB}}}{\sqrt{3n}} \prod_{i=2}^{d-1} \Omega(i) \prod_{i=1}^{d-1} Q_\sigma(i) \int_0^{\frac{q(1)}{2\|\mathbf{w}_1\|^\tau}} \varphi(x | 0, 1) dx \\ &\stackrel{(i)}{\geq} \frac{M_F(1) M_F(d) \Gamma_{\text{uB}}}{\sqrt{3n}} \prod_{i=2}^{d-1} \Omega(i) \prod_{i=1}^{d-1} Q_\sigma(i) \int_0^{\frac{q(1)}{2M_F(1)\Gamma_{\text{uB}}}} \varphi(x | 0, 1) dx, \\ &\geq \frac{M_F(1) M_F(d) \Gamma_{\text{uB}}}{\sqrt{3n}} \prod_{i=2}^{d-1} \Omega(i) \prod_{i=1}^{d-1} Q_\sigma(i) \left(1 - \Phi\left(\frac{q(1)}{2M_F(1)\Gamma_{\text{uB}}}\right)\right), \end{aligned} \quad (34)$$

where (i) follows from the fact that  $\|\mathbf{w}_1\| = M_F(1)$ ,  $\tau = \Gamma_{\text{uB}} \sqrt{\frac{1}{3} \left(2 + \frac{n}{m}\right)} \leq \Gamma_{\text{uB}}$  and  $\Phi(\cdot)$  is the CDF of the standard Gaussian distribution.

Next, we upper-bound the KL divergence between the distributions  $\mathbb{P}_2$  and  $\mathbb{P}_1$  as follows.

$$\begin{aligned} \text{KL}(\mathbb{P}_2 \| \mathbb{P}_1) &= \text{KL}(\mu_2^n \| \mu_1^n) + \text{KL}(\nu_2^m \| \nu_1^m) \\ &= n \text{KL}(\mu_2 \| \mu_1) + m \text{KL}(\nu_2 \| \nu_1) \\ &= n \frac{\|\mathbf{u}_1\|^2}{2\tau^2} + m \frac{\|\mathbf{u}_2\|^2}{2\tau^2} = \frac{1}{2}. \end{aligned} \quad (35)$$

Combining (34), (35) and Lemma 1 yields

$$\inf_{\hat{d}(n, m)} \sup_{\mu, \nu \in \mathcal{P}_{\text{uB}}} \mathbb{P} \left\{ \left| \hat{d}(n, m) - d_{\mathcal{F}_{nn}}(\mu, \nu) \right| \geq \frac{C(\mathcal{P}_{\text{uB}})}{\sqrt{n}} \right\} \geq \max\left\{\frac{1}{4}e^{-1/2}, \frac{1}{4}\right\} = \frac{1}{4}.$$

where  $C(\mathcal{P}_{\text{uB}})$  is the constant given by (10).

**Case 2: parameter set  $\mathcal{W}_{1, \infty}$ .** Recall from (5) that  $\mathcal{W}_{1, \infty}$  is defined as

$$\mathcal{W}_{1, \infty} := \prod_{i=1}^{d-1} \left\{ \mathbf{W}_i \in \mathbb{R}^{n_i \times m_i} : \|\mathbf{W}_i\|_{1, \infty} \leq M_{1, \infty}(i) \right\} \times \left\{ \mathbf{w}_d \in \mathbb{R}^{n_d} : \|\mathbf{w}_d\|_1 \leq M_{1, \infty}(d) \right\}.$$

The proof for this case follows the steps similar to those in Case 1. To apply Lemma 1, we select four distributions  $\mu_1, \nu_1, \mu_2$  and  $\nu_2$  as in (22) with

$$\begin{aligned} \mathbf{u}_1 &= [b_1, 0, 0, \dots, 0]^T, \mathbf{u}_2 = [b_2, 0, 0, \dots, 0]^T, \tau^2 = \frac{\Gamma_{\text{uB}}^2}{3} \left(2 + \frac{n}{m}\right), \\ b_1^2 &= \frac{\Gamma_{\text{uB}}^2}{3} \left(\frac{1}{n} + \frac{1}{m}\right), b_2^2 = \frac{\Gamma_{\text{uB}}^2}{3m}, (b_1 - b_2)^2 = \frac{\Gamma_{\text{uB}}^2}{3n}. \end{aligned} \quad (36)$$

Note that this construction also implies (23). Based on this construction, we pick the weights in  $\hat{f}(\mathbf{x}) = \hat{\mathbf{w}}_d^T \sigma_{d-1}(\dots \sigma_1(\hat{\mathbf{W}}_1 \mathbf{x})) \in \mathcal{F}_{nn}$  as follows.

1.  $\hat{\mathbf{w}}_d(1) = M_{1,\infty}(d)$ ,  $\hat{\mathbf{w}}_d(s) = 0$  for  $s \neq 1$ ,
2. For  $i = 2, 3, \dots, d-1$ ,  $\hat{\mathbf{W}}_i = [\hat{\mathbf{w}}_i, \hat{\mathbf{w}}_i, \dots, \hat{\mathbf{w}}_i]^T$ ,  $\hat{\mathbf{w}}_i(1) = M_{1,\infty}(i)$ ,  $\hat{\mathbf{w}}_i(s) = 0$  for  $s \neq 1$ ,
3.  $\hat{\mathbf{W}}_1 = [\mathbf{w}_1, \mathbf{w}_1, \dots, \mathbf{w}_1]^T$ ,  $\mathbf{w}_1 = M_{1,\infty}(1)(\mathbf{u}_1 - \mathbf{u}_2)/\|\mathbf{u}_1 - \mathbf{u}_2\|$ .

Clearly, (37) implies that  $\|\hat{\mathbf{w}}_d\|_1 = M_{1,\infty}(d)$ ,  $\|\hat{\mathbf{W}}_1\|_{1,\infty} = \|\hat{\mathbf{w}}_1\|_1 = \|\hat{\mathbf{w}}_1\| = M_{1,\infty}(1)$  and  $\|\hat{\mathbf{W}}_i\|_{1,\infty} = \|\hat{\mathbf{w}}_i\|_1 = M_{1,\infty}(i)$  for  $i = 2, \dots, d-1$ . Using the parameters chosen in (37), we have

$$\begin{aligned} \hat{f}(\mathbf{x}) &= M_{1,\infty}(d) \sigma_{d-1}(\dots (\hat{\mathbf{w}}_{d-1}^T \mathbf{1}) \sigma_{d-2}(\dots (\hat{\mathbf{w}}_{d-1}^T \mathbf{1}) \sigma_1(\mathbf{w}_1^T \mathbf{x}))) \\ &= M_{1,\infty}(d) \sigma_{d-1}(M_{1,\infty}(d-1) \sigma_{d-2} \dots M_{1,\infty}(2) \sigma_1(\mathbf{w}_1^T \mathbf{x})), \end{aligned} \quad (38)$$

where  $\mathbf{1}$  denotes the all-one vector. Then, we have

$$\begin{aligned} |d_{\mathcal{F}_{nn}}(\mu_1, \nu_1) - d_{\mathcal{F}_{nn}}(\mu_2, \nu_2)| &= d_{\mathcal{F}_{nn}}(\mu_1, \nu_1) = \sup_{f \in \mathcal{F}_{nn}} |\mathbb{E}_{\mathbf{x} \sim \mu_1} f(\mathbf{x}) - \mathbb{E}_{\mathbf{x} \sim \nu_1} f(\mathbf{x})| \\ &\geq |\mathbb{E}_{\mathbf{x} \sim \mu_1} \hat{f}(\mathbf{x}) - \mathbb{E}_{\mathbf{x} \sim \nu_1} \hat{f}(\mathbf{x})|. \end{aligned}$$

The remaining steps are the same as in Case 1, and are omitted.

## A.2 Proof of Corollary 1

Recall that if  $\sigma_i(\cdot)$  is ReLU, then  $q(i) \leq \infty$  and  $Q_\sigma(i) = 1$ . For the parameter set  $\mathcal{W}_F$ , we choose  $q(1) = M_F(1)\Gamma_{\text{uB}}$  and  $q(i) = \infty$  for  $i = 2, \dots, d-1$  in Theorem 1. Then we obtain that  $q(1)/(2M_F(1)\Gamma_{\text{uB}}) = 0.5$  and  $\Omega(i) = M_F(i)$ , which, combined with  $\sqrt{3}(1 - \Phi(0.5))/6 > 0.08$ , finish the proof. The result for the parameter set  $\mathcal{W}_{1,\infty}$  can be proved in the same way.

## B Proof of Theorem 2

The proof is also based on the Le Cam's method (Lemma 1) as in Appendix A.1. However, here we deal with the bounded-support class of distributions. Hence, the hypothesis distributions we choose here are different. Suppose  $m > n$  and the case  $m < n$  follows the same steps.

**Case 1: parameter set is  $\mathcal{W}_F$ .** To use Lemma 1, we construct the following four distributions:

$$\mu_1(\mathbf{x}) = \begin{cases} \frac{1}{2} - \epsilon & \text{if } \mathbf{x} = \mathbf{x}_1 \\ \frac{1}{2} + \epsilon & \text{if } \mathbf{x} = -\mathbf{x}_1 \end{cases} \quad \nu_1(\mathbf{x}) = \mu_2(\mathbf{x}) = \nu_2(\mathbf{x}) = \begin{cases} \frac{1}{2} & \text{if } \mathbf{x} = \mathbf{x}_1 \\ \frac{1}{2} & \text{if } \mathbf{x} = -\mathbf{x}_1 \end{cases} \quad (39)$$

where  $\epsilon = \sqrt{2}n^{-\frac{1}{2}}/4 < 1/2$  and  $\|\mathbf{x}_1\| = \Gamma_B$ .

First, we lower-bound  $|d_{\mathcal{F}_{nn}}(\mu_1, \nu_1) - d_{\mathcal{F}_{nn}}(\mu_2, \nu_2)|$ . Based on the construction (39), we obtain

$$\begin{aligned} |d_{\mathcal{F}_{nn}}(\mu_1, \nu_1) - d_{\mathcal{F}_{nn}}(\mu_2, \nu_2)| &= d_{\mathcal{F}_{nn}}(\mu_1, \nu_1) \\ &= \sup_{f \in \mathcal{F}_{nn}} |\mathbb{E}_{\mathbf{x} \sim \mu_1} f(\mathbf{x}) - \mathbb{E}_{\mathbf{x} \sim \nu_1} f(\mathbf{x})| \\ &= \sup_{f \in \mathcal{F}_{nn}} \left| \left(\frac{1}{2} - \epsilon\right) f(\mathbf{x}_1) + \left(\frac{1}{2} + \epsilon\right) f(-\mathbf{x}_1) - \frac{1}{2} f(\mathbf{x}_1) - \frac{1}{2} f(-\mathbf{x}_1) \right| \\ &= \epsilon \sup_{f \in \mathcal{F}_{nn}} |f(\mathbf{x}_1) - f(-\mathbf{x}_1)| \\ &\geq \epsilon |\tilde{f}(\mathbf{x}_1) - \tilde{f}(-\mathbf{x}_1)| \\ &= \epsilon (M_F(d) \sigma_{d-1}(\dots \sigma_1(M_F(1)\Gamma_B)) - M_F(d) \sigma_{d-1}(\dots \sigma_1(-M_F(1)\Gamma_B))), \end{aligned} \quad (40)$$

where the function  $\tilde{f}(\mathbf{x}) \in \mathcal{F}_{nn}$  is constructed using an approach similar to (26), which is given by

$$\tilde{f}(\mathbf{x}) = M_F(d)\sigma_{d-1} \left( M_F(d-1) \cdots M_F(2)\sigma_1 \left( \mathbf{w}_1^T \mathbf{x} \right) \right) \text{ with } \mathbf{w}_1 = M_F(1)\mathbf{x}_1/\|\mathbf{x}_1\|.$$

Next, we derive an upper bound on the KL divergence between the distributions as follows.

$$\begin{aligned} \text{KL}(\mathbb{P}_2\|\mathbb{P}_1) &= n\text{KL}(\mu_2\|\mu_1) + m\text{KL}(\nu_2\|\nu_1) \\ &\stackrel{(i)}{=} n \left( \frac{1}{2} \log \left( \frac{1}{1-2\epsilon} \right) + \frac{1}{2} \log \left( \frac{1}{1+2\epsilon} \right) \right) \\ &= \frac{1}{2} n \log \left( 1 + \frac{4\epsilon^2}{1-4\epsilon^2} \right) \stackrel{(ii)}{\leq} \frac{1}{2} n \frac{4\epsilon^2}{1-4\epsilon^2} \\ &\stackrel{(iii)}{\leq} \frac{1}{4-2/n} \leq \frac{1}{2}, \end{aligned} \tag{41}$$

where (i) follows from the fact that  $\nu_1 = \nu_2$ , (ii) follows from the inequality that  $\log(1+x) \leq x$  for  $x > 0$  and (iii) follows because  $\epsilon = \sqrt{2}n^{-\frac{1}{2}}/4$ . Hence, combining (40), (41),  $\epsilon = \sqrt{2}n^{-\frac{1}{2}}/4$  and Lemma 1, and noting that  $\sqrt{2}/8 > 0.17$ , we complete the proof.

**Case 2: parameter set is  $\mathcal{W}_{1,\infty}$ .** Similarly to the proof for Case 1, we select the same distributions as in (39) with the parameters satisfying

$$\mathbf{x}_1 = [\Gamma_B, 0, 0, \dots, 0]^T, \quad \epsilon = \sqrt{2}n^{-1/2}/4. \tag{42}$$

Clearly, (42) implies  $\|\mathbf{x}_1\|_1 = \|\mathbf{x}_1\| = \Gamma_B$ . Using an approach similar to (40), we obtain

$$\begin{aligned} |d_{\mathcal{F}_{nn}}(\mu_1, \nu_1) - d_{\mathcal{F}_{nn}}(\mu_2, \nu_2)| &= d_{\mathcal{F}_{nn}}(\mu_1, \nu_1) \\ &= \sup_{f \in \mathcal{F}_{nn}} |\mathbb{E}_{\mathbf{x} \sim \mu_1} f(\mathbf{x}) - \mathbb{E}_{\mathbf{x} \sim \nu_1} f(\mathbf{x})| \\ &= \epsilon \sup_{f \in \mathcal{F}_{nn}} |f(\mathbf{x}_1) - f(-\mathbf{x}_1)| \\ &\geq \epsilon |\hat{f}(\mathbf{x}_1) - \hat{f}(-\mathbf{x}_1)| \\ &= \epsilon (M_{1,\infty}(d)\sigma_{d-1}(\cdots \sigma_1(M_{1,\infty}(1)\Gamma_B)) - M_{1,\infty}(d)\sigma_{d-1}(\cdots \sigma_1(-M_{1,\infty}(1)\Gamma_B))), \end{aligned} \tag{43}$$

where the function  $\hat{f}(\mathbf{x}) \in \mathcal{F}_{nn}$  is constructed based on a approach similar to (38), which is given by

$$\hat{f}(\mathbf{x}) = M_{1,\infty}(d)\sigma_{d-1} \left( \cdots M_{1,\infty}(2)\sigma_1 \left( \mathbf{w}_1^T \mathbf{x} \right) \right) \text{ with } \mathbf{w}_1 = M_{1,\infty}(1)\mathbf{x}_1/\|\mathbf{x}_1\|. \tag{44}$$

Substituting  $\epsilon = \sqrt{2}n^{-1/2}/4$  into (43) and adopting the same steps in (41), we finish the proof by Lemma 1.

## C Proof of Theorem 3

As we outline in Section 3.4, the proof of Theorem 3 follows from the proofs of Theorems 5, 6 and 7 as three main steps. We next provide the proofs for these theorems in three subsections.

### C.1 Proof of Theorem 5

The proof follows from the general idea in [11] for the scalar case. The major technical development here lies in upper-bounding  $\mathbb{E}(e^{\lambda \mathbf{V}_i} | \mathbf{x}_1, \dots, \mathbf{x}_{i-1})$  for the martingale difference  $\mathbf{V}_i$  based on a tail bound of sub-Gaussian random vectors, and then using the bound of  $\mathbb{E}(e^{\lambda \mathbf{V}_i} | \mathbf{x}_1, \dots, \mathbf{x}_{i-1})$  to yield (15) by Markov's inequality. To simplify the notation in the proof, we use  $\mathbf{x}_{n+1}, \dots, \mathbf{x}_{n+m}$  to denote  $\mathbf{y}_1, \dots, \mathbf{y}_m$ .

Let  $\mathbf{V}_i = \mathbb{E}_{\mathbf{x}_1, \dots, \mathbf{x}_{n+m}}(F|\mathbf{x}_1, \dots, \mathbf{x}_i) - \mathbb{E}_{\mathbf{x}_1, \dots, \mathbf{x}_{n+m}}(F|\mathbf{x}_1, \dots, \mathbf{x}_{i-1})$ . Then, we have

$$\begin{aligned}
\mathbb{E}(e^{\lambda \mathbf{V}_i} | \mathbf{x}_1, \dots, \mathbf{x}_{i-1}) &= \int_{\mathbf{x}_i} e^{\lambda \mathbb{E}(F|\mathbf{x}_1, \dots, \mathbf{x}_i) - \lambda \mathbb{E}(F|\mathbf{x}_1, \dots, \mathbf{x}_{i-1})} d\mathbb{P}_{\mathbf{x}_i} \\
&\stackrel{(i)}{\leq} \int_{\mathbf{x}_i} \mathbb{E}_{\mathbf{x}_{i+1}, \dots, \mathbf{x}_{n+m}} e^{\lambda F} \mathbb{E}_{\mathbf{x}_i, \dots, \mathbf{x}_{n+m}} e^{-\lambda F} d\mathbb{P}_{\mathbf{x}_i} \\
&= \int_{\mathbf{x}_i} \left( \int_{\mathbf{x}_{i+1}, \dots, \mathbf{x}_{n+m}} e^{\lambda F} d\mathbb{P}_{\mathbf{x}_{i+1}} \cdots d\mathbb{P}_{\mathbf{x}_{n+m}} \int_{\mathbf{x}'_i, \dots, \mathbf{x}_{n+m}} e^{-\lambda F} d\mathbb{P}_{\mathbf{x}'_i} \cdots d\mathbb{P}_{\mathbf{x}_{n+m}} \right) d\mathbb{P}_{\mathbf{x}_i} \\
&= \int_{\mathbf{x}_{i+1}, \dots, \mathbf{x}_{n+m}} \left( \int_{\mathbf{x}_i, \mathbf{x}'_i} e^{\lambda F(\dots, \mathbf{x}_i, \dots) - \lambda F(\dots, \mathbf{x}'_i, \dots)} d\mathbb{P}_{\mathbf{x}_i} d\mathbb{P}_{\mathbf{x}'_i} \right) d\mathbb{P}_{\mathbf{x}_{i+1}} \cdots d\mathbb{P}_{\mathbf{x}_{n+m}}, \quad (45)
\end{aligned}$$

where (i) follows from the Jensen's inequality. Then, using the fact that  $e^t + e^{-t} \leq e^{-s} + e^s$  for  $\forall |t| \leq s$  and noting (14), we have, for  $1 \leq i \leq n$ ,

$$e^{\lambda(F(\dots, \mathbf{x}_i, \dots) - F(\dots, \mathbf{x}'_i, \dots))} + e^{-\lambda(F(\dots, \mathbf{x}_i, \dots) - F(\dots, \mathbf{x}'_i, \dots))} \leq e^{\frac{\lambda L_{\mathcal{F}} \|\mathbf{x}_i - \mathbf{x}'_i\|}{n}} + e^{-\frac{\lambda L_{\mathcal{F}} \|\mathbf{x}_i - \mathbf{x}'_i\|}{n}}. \quad (46)$$

Thus, we have, for  $1 \leq i \leq n$ ,

$$\begin{aligned}
&\int_{\mathbf{x}_i, \mathbf{x}'_i} e^{\lambda F(\mathbf{x}_1, \dots, \mathbf{x}_i, \dots, \mathbf{x}_{n+m}) - \lambda F(\mathbf{x}_1, \dots, \mathbf{x}'_i, \dots, \mathbf{x}_{n+m})} d\mathbb{P}_{\mathbf{x}_i} d\mathbb{P}_{\mathbf{x}'_i} \\
&\stackrel{(i)}{=} \frac{1}{2} \int_{\mathbf{x}_i, \mathbf{x}'_i} e^{\lambda(F(\dots, \mathbf{x}_i, \dots) - F(\dots, \mathbf{x}'_i, \dots))} + e^{-\lambda(F(\dots, \mathbf{x}_i, \dots) - F(\dots, \mathbf{x}'_i, \dots))} d\mathbb{P}_{\mathbf{x}_i} d\mathbb{P}_{\mathbf{x}'_i} \\
&\stackrel{(ii)}{\leq} \frac{1}{2} \int_{\mathbf{x}_i, \mathbf{x}'_i} e^{\lambda L_{\mathcal{F}} \|\mathbf{x}_i - \mathbf{x}'_i\|/n} + e^{-\lambda L_{\mathcal{F}} \|\mathbf{x}_i - \mathbf{x}'_i\|/n} d\mathbb{P}_{\mathbf{x}_i} d\mathbb{P}_{\mathbf{x}'_i} \\
&= \frac{1}{2} \mathbb{E}_{\mathbf{x}_i, \mathbf{x}'_i} \left( e^{\lambda L_{\mathcal{F}} \|\mathbf{x}_i - \mathbf{x}'_i\|/n} + e^{-\lambda L_{\mathcal{F}} \|\mathbf{x}_i - \mathbf{x}'_i\|/n} \right) \\
&\stackrel{(iii)}{\leq} \mathbb{E}_{\mathbf{x}_i, \mathbf{x}'_i} e^{\lambda^2 L_{\mathcal{F}}^2 \|\mathbf{x}_i - \mathbf{x}'_i\|^2 / (2n^2)} = \mathbb{E}_{\mathbf{z}_i} e^{\lambda^2 L_{\mathcal{F}}^2 \|\mathbf{z}_i\|^2 / (2n^2)} \quad (47)
\end{aligned}$$

where (i) follows from the symmetry between  $\mathbf{x}_i$  and  $\mathbf{x}'_i$ , (ii) is based on (46), (iii) follows from the inequality that  $(e^x + e^{-x})/2 \leq e^{x^2/2}$ , and we set  $\mathbf{z}_i = \mathbf{x}_i - \mathbf{x}'_i$  in the last equality. Since  $\mathbf{x}_i$  and  $\mathbf{x}_i$  are both sub-Gaussian with mean  $\mathbf{u}_x$  and variance parameter  $\tau_x$ , we have  $\mathbb{E}(\mathbf{z}_i) = 0$  and

$$\mathbb{E} e^{\mathbf{a}^T \mathbf{z}_i} = \mathbb{E} e^{\mathbf{a}^T \mathbf{x}_i} \mathbb{E} e^{-\mathbf{a}^T \mathbf{x}'_i} \leq e^{\|\mathbf{a}\|^2 \sigma_x^2 / 2} e^{\|\mathbf{a}\|^2 \sigma_x^2 / 2} = e^{\|\mathbf{a}\|^2 \sigma_x^2}, \quad (48)$$

which implies that  $\mathbf{z}_i$  is a zero-mean sub-Gaussian random variable with the variance parameter  $2\sigma_x^2$ . Next, we quote the following tail inequality from [10], which is useful here.

**Lemma 3** (Theorem 1 in [10]). *Let  $\mathbf{A} \in \mathbb{R}^{h \times h}$  be a matrix and let  $\Sigma = \mathbf{A}^T \mathbf{A}$ . Suppose that  $\mathbf{x}$  is a sub-Gaussian random vector with mean  $\mathbf{u} \in \mathbb{R}^h$  and variance parameter  $\tau^2$ . Then, for  $0 \leq \eta < 1/(2\tau^2 \|\Sigma\|)$ ,*

$$\mathbb{E} \left( e^{\eta \|\mathbf{A}\mathbf{x}\|^2} \right) \leq \exp \left( \tau^2 \text{tr}(\Sigma) \eta + \frac{\tau^4 \text{tr}(\Sigma^2) \eta^2 + \|\mathbf{A}\mathbf{u}\|^2 \eta}{1 - 2\tau^2 \|\Sigma\| \eta} \right). \quad (49)$$

Recall from (48) that  $\mathbf{z}_i$  is sub-Gaussian with variance parameter  $2\tau_x^2$  and mean  $\mathbf{0}$ . Then, letting  $\mathbf{A} = \mathbf{I}_h$  and  $\mathbf{u} = \mathbf{0}$  in Lemma 3 and using (47), we have, for  $n \geq \sqrt{2}\tau_x \lambda L_{\mathcal{F}}$ ,

$$\mathbb{E} \exp \left( \frac{\lambda^2 L_{\mathcal{F}}^2}{2n^2} \|\mathbf{z}_i\|^2 \right) \leq \exp \left( \frac{\tau_x^2 h \lambda^2 L_{\mathcal{F}}^2}{n^2} + \frac{\tau_x^4 h \lambda^4 L_{\mathcal{F}}^4}{n^4 - 2\tau_x^2 \lambda^2 L_{\mathcal{F}}^2 n^2} \right). \quad (50)$$

Assume that  $n \geq \sqrt{3}\tau_x \lambda L_{\mathcal{F}}$ . Then, (50) can be further upper-bounded by

$$\mathbb{E} \exp \left( \frac{\lambda^2 L_{\mathcal{F}}^2}{2n^2} \|\mathbf{z}_i\|^2 \right) \leq \exp \left( \frac{2\tau_x^2 h \lambda^2 L_{\mathcal{F}}^2}{n^2} \right),$$

which, in conjunction with (45) and (47), implies that for  $1 \leq i \leq n$ ,

$$\mathbb{E} (e^{\lambda \mathbf{V}_i} | \mathbf{x}_1, \dots, \mathbf{x}_{i-1}) \leq \exp (2\tau_x^2 h \lambda^2 L_{\mathcal{F}}^2 / n^2). \quad (51)$$

Using similar steps, we obtain, for  $n + 1 \leq i \leq n + m$  and  $m \geq \sqrt{3}\tau_y\lambda L_{\mathcal{F}}$ ,

$$\mathbb{E}(e^{\lambda \mathbf{V}_i} | \mathbf{x}_1, \dots, \mathbf{x}_{i-1}) \leq \exp(2\tau_y^2 h \lambda^2 L_{\mathcal{F}}^2 / m^2). \quad (52)$$

Then, using (51), (52) and Markov's inequality, we have

$$\begin{aligned} & \mathbb{P}(F(\mathbf{x}_1, \dots, \mathbf{x}_{n+m}) - \mathbb{E} F(\mathbf{x}_1, \dots, \mathbf{x}_{n+m}) \geq \epsilon) \\ &= \mathbb{P}\left(\sum_{i=1}^{n+m} \mathbf{V}_i > \epsilon\right) \leq e^{-\lambda \epsilon} \mathbb{E}_{\mathbf{x}_1, \dots, \mathbf{x}_{n+m}} \left(\prod_{i=1}^{n+m} e^{\lambda \mathbf{V}_i}\right) \\ &= e^{-\lambda \epsilon} \mathbb{E}_{\mathbf{x}_1, \dots, \mathbf{x}_{n+m-1}} \left(\mathbb{E}_{\mathbf{x}_{n+m}} \left(\prod_{i=1}^{n+m} e^{\lambda \mathbf{V}_i} | \mathbf{x}_1, \dots, \mathbf{x}_{n+m-1}\right)\right) \\ &= e^{-\lambda \epsilon} \mathbb{E}_{\mathbf{x}_1, \dots, \mathbf{x}_{n+m-1}} \left(\prod_{i=1}^{n+m-1} e^{\lambda \mathbf{V}_i} \mathbb{E}_{\mathbf{x}_{n+m}} (e^{\lambda \mathbf{V}_{n+m}} | \mathbf{x}_1, \dots, \mathbf{x}_{n+m-1})\right) \\ &\stackrel{(i)}{\leq} e^{-\lambda \epsilon} e^{2\tau_y^2 h \lambda^2 L_{\mathcal{F}}^2 / m^2} \mathbb{E}_{\mathbf{x}_1, \dots, \mathbf{x}_{n+m-1}} \left(\prod_{i=1}^{n+m-1} e^{\lambda \mathbf{V}_i}\right) \\ &\stackrel{(ii)}{\leq} \exp(-\lambda \epsilon + 2\tau_y^2 h \lambda^2 L_{\mathcal{F}}^2 / m + 2\tau_x^2 h \lambda^2 L_{\mathcal{F}}^2 / n) \\ &\stackrel{(iii)}{\leq} \exp(-\lambda \epsilon + 2\Gamma_{\text{uB}}^2 h \lambda^2 L_{\mathcal{F}}^2 / m + 2\Gamma_{\text{uB}}^2 h \lambda^2 L_{\mathcal{F}}^2 / n), \end{aligned} \quad (53)$$

where (ii) follows by repeating (i) for  $n + m - 1$  times and (iii) follows from the fact that  $0 < \tau_x, \tau_y \leq \Gamma_{\text{uB}}$ . Let  $M = \Gamma_{\text{uB}}^2 h L_{\mathcal{F}}^2$ . Optimizing (53) over  $\lambda$ , we have  $\lambda = \epsilon M^{-1} (1/n + 1/m)^{-1}$  and

$$\mathbb{P}(F(\mathbf{x}_1, \dots, \mathbf{x}_{n+m}) - \mathbb{E} F(\mathbf{x}_1, \dots, \mathbf{x}_{n+m}) \geq \epsilon) \leq \exp\left(\frac{-\epsilon^2 nm}{8M(n+m)}\right). \quad (54)$$

Recall that our proof requires that  $n \geq \sqrt{3}\tau_x\lambda L_{\mathcal{F}}$  and  $m \geq \sqrt{3}\tau_y\lambda L_{\mathcal{F}}$ , which, based on the facts that  $\lambda = \epsilon M^{-1} (1/n + 1/m)^{-1}$  and  $0 < \tau_x, \tau_y \leq \Gamma_{\text{uB}}$ , are satisfied for any  $0 < \epsilon \leq \sqrt{3}h\Gamma_{\text{uB}}L_{\mathcal{F}} \min\{m, n\}(n^{-1} + m^{-1})$ . Thus, the proof is complete.

## C.2 Proof of Theorem 6

Based on the definition of  $d_{\mathcal{F}_{nn}}(\mu, \nu)$ , we have

$$\begin{aligned} |d_{\mathcal{F}_{nn}}(\mu, \nu) - d_{\mathcal{F}_{nn}}(\hat{\mu}, \hat{\nu})| &= \left| \sup_{f \in \mathcal{F}_{nn}} |\mathbb{E}_{\mathbf{x} \sim \mu} f(\mathbf{x}) - \mathbb{E}_{\mathbf{y} \sim \nu} f(\mathbf{y})| - \sup_{f \in \mathcal{F}_{nn}} |\mathbb{E}_{\mathbf{x} \sim \hat{\mu}} f(\mathbf{x}) - \mathbb{E}_{\mathbf{y} \sim \hat{\nu}} f(\mathbf{y})| \right| \\ &\leq \sup_{f \in \mathcal{F}_{nn}} \left| \underbrace{\mathbb{E}_{\mathbf{x} \sim \mu} f(\mathbf{x}) - \frac{1}{n} \sum_{i=1}^n f(\mathbf{x}_i)}_{F(\mathbf{x}_1, \dots, \mathbf{x}_n, \mathbf{y}_1, \dots, \mathbf{y}_m)} - \left( \mathbb{E}_{\mathbf{y} \sim \nu} f(\mathbf{y}) - \frac{1}{m} \sum_{i=1}^m f(\mathbf{y}_i) \right) \right|. \end{aligned} \quad (55)$$

First note that for  $\forall 1 \leq i \leq n$ ,

$$|F(\mathbf{x}_1, \dots, \mathbf{x}_i, \dots, \mathbf{y}_m) - F(\mathbf{x}_1, \dots, \mathbf{x}'_i, \dots, \mathbf{y}_m)| \leq \sup_{f \in \mathcal{F}_{nn}} |f(\mathbf{x}_i) - f(\mathbf{x}'_i)| / n. \quad (56)$$

If the parameter set is  $\mathcal{W}_F$ , then using Cauchy-Schwarz inequality, we have

$$\begin{aligned} |f(\mathbf{x}_i) - f(\mathbf{x}'_i)| &= |\mathbf{w}_d^T \sigma_{d-1}(\dots \sigma_1(\mathbf{W}_1 \mathbf{x}_i)) - \mathbf{w}_d^T \sigma_{d-1}(\dots \sigma_1(\mathbf{W}_1 \mathbf{x}'_i))| \\ &\leq M_F(d) \|\sigma_{d-1}(\dots \sigma_1(\mathbf{W}_1 \mathbf{x}_i)) - \sigma_{d-1}(\dots \sigma_1(\mathbf{W}_1 \mathbf{x}'_i))\| \\ &\stackrel{(i)}{\leq} M_F(d) L_{d-1} \|\mathbf{W}_{d-1} \sigma_{d-2}(\dots \sigma_1(\mathbf{W}_1 \mathbf{x}_i)) - \mathbf{W}_{d-1} \sigma_{d-2}(\dots \sigma_1(\mathbf{W}_1 \mathbf{x}'_i))\| \\ &\leq M_F(d) L_{d-1} M_F(d-1) \|\sigma_{d-2}(\dots \sigma_1(\mathbf{W}_1 \mathbf{x}_i)) - \sigma_{d-2}(\dots \sigma_1(\mathbf{W}_1 \mathbf{x}'_i))\|, \end{aligned} \quad (57)$$

where (i) follows from the fact that  $\sigma_{d-1}(\cdot)$  is  $L_{d-1}$ -Lipschitz. Repeating the process (57), we obtain

$$|f(\mathbf{x}_i) - f(\mathbf{x}'_i)| \leq \prod_{i=1}^d M_F(i) \prod_{i=1}^{d-1} L_i \|\mathbf{x}_i - \mathbf{x}'_i\|,$$

which, in conjunction with (56), implies that, for  $\forall 1 \leq i \leq n$

$$|F(\mathbf{x}_1, \dots, \mathbf{x}_i, \dots, \mathbf{y}_m) - F(\mathbf{x}_1, \dots, \mathbf{x}'_i, \dots, \mathbf{y}_m)| \leq \prod_{i=1}^d M_F(i) \prod_{i=1}^{d-1} L_i \|\mathbf{x}_i - \mathbf{x}'_i\|/n. \quad (58)$$

Similarly, we can get, for  $\forall 1 \leq i \leq m$ ,

$$|F(\mathbf{x}_1, \dots, \mathbf{y}_i, \dots, \mathbf{y}_m) - F(\mathbf{x}_1, \dots, \mathbf{y}'_i, \dots, \mathbf{y}_m)| \leq \prod_{i=1}^d M_F(i) \prod_{i=1}^{d-1} L_i \|\mathbf{y}_i - \mathbf{y}'_i\|/m. \quad (59)$$

Let  $K := \prod_{i=1}^d M_F(i) \prod_{i=1}^{d-1} L_i$ . Combining (58), (59) and Theorem 5, we have, for any  $0 < \epsilon \leq \sqrt{3}h\Gamma_{\text{ub}}K \min\{m, n\}(n^{-1} + m^{-1})$ ,

$$\mathbb{P}(F(\mathbf{x}_1, \dots, \mathbf{x}_n, \dots, \mathbf{y}_m) - \mathbb{E}F(\mathbf{x}_1, \dots, \mathbf{x}_n, \dots, \mathbf{y}_m) \geq \epsilon) \leq \exp\left(\frac{-\epsilon^2 mn}{8h\Gamma_{\text{ub}}^2 K^2(m+n)}\right), \quad (60)$$

where  $\Gamma_{\text{ub}}$  is defined in (8). Plugging  $\delta = \exp(-\epsilon^2 mn/(8h\Gamma_{\text{ub}}^2 K^2(m+n)))$  in (60) implies that, if  $\sqrt{6}h \min\{n, m\}\sqrt{m^{-1} + n^{-1}} \geq 4\sqrt{\log(1/\delta)}$ , then with probability at least  $1 - \delta$ ,

$$F(\mathbf{x}_1, \dots, \mathbf{y}_m) \leq \mathbb{E}F(\mathbf{x}_1, \dots, \mathbf{y}_m) + 2\Gamma_{\text{ub}} \prod_{i=1}^d M_F(i) \prod_{i=1}^{d-1} L_i \sqrt{2h \left(\frac{1}{n} + \frac{1}{m}\right) \log \frac{1}{\delta}}. \quad (61)$$

Next, we upper-bound the expectation term in (61) through the following steps.

$$\begin{aligned} & \mathbb{E}F(\mathbf{x}_1, \dots, \mathbf{x}_n, \dots, \mathbf{y}_m) \\ &= \mathbb{E}_{\{\mathbf{x}_i\}, \{\mathbf{y}_i\}} \sup_{f \in \mathcal{F}_{nn}} \left| \mathbb{E}_{\mathbf{x} \sim \mu} f(\mathbf{x}) - \frac{1}{n} \sum_{i=1}^n f(\mathbf{x}_i) - \left( \mathbb{E}_{\mathbf{y} \sim \nu} f(\mathbf{y}) - \frac{1}{m} \sum_{i=1}^m f(\mathbf{y}_i) \right) \right| \\ &\leq \mathbb{E}_{\mathbf{x}, \mathbf{y}, \mathbf{x}', \mathbf{y}', \epsilon, \epsilon'} \sup_{f \in \mathcal{F}_{nn}} \left| \frac{1}{n} \sum_{i=1}^n \epsilon_i (f(\mathbf{x}'_i) - f(\mathbf{x}_i)) - \frac{1}{m} \sum_{i=1}^m \epsilon'_i (f(\mathbf{y}'_i) - f(\mathbf{y}_i)) \right| \\ &\leq \mathbb{E}_{\mathbf{x}, \mathbf{x}', \epsilon} \sup_{f \in \mathcal{F}_{nn}} \left| \frac{1}{n} \sum_{i=1}^n \epsilon_i (f(\mathbf{x}'_i) - f(\mathbf{x}_i)) \right| + \mathbb{E}_{\mathbf{y}, \mathbf{y}', \epsilon'} \sup_{f \in \mathcal{F}_{nn}} \left| \frac{1}{m} \sum_{i=1}^m \epsilon'_i (f(\mathbf{y}'_i) - f(\mathbf{y}_i)) \right| \\ &\leq 2\mathcal{R}_n(\mathcal{F}_{nn}, \mu) + 2\mathcal{R}_m(\mathcal{F}_{nn}, \nu) \end{aligned} \quad (62)$$

which, combined with (55) and (61), finishes the proof for the parameter set  $\mathcal{W}_F$ .

If the parameter set is  $\mathcal{W}_{1,\infty}$ , then we have

$$\begin{aligned} |f(\mathbf{x}_i) - f(\mathbf{x}'_i)| &= |\mathbf{w}_d^T \sigma_{d-1}(\dots \sigma_1(\mathbf{W}_1 \mathbf{x}_i)) - \mathbf{w}_d^T \sigma_{d-1}(\dots \sigma_1(\mathbf{W}_1 \mathbf{x}'_i))| \\ &\stackrel{(i)}{\leq} \|\mathbf{w}_d\|_1 \|\sigma_{d-1}(\dots \sigma_1(\mathbf{W}_1 \mathbf{x}_i)) - \sigma_{d-1}(\dots \sigma_1(\mathbf{W}_1 \mathbf{x}'_i))\|_\infty \\ &\leq M_{1,\infty}(d) L_{d-1} \|\mathbf{W}_{d-1} \sigma_{d-2}(\dots \sigma_1(\mathbf{W}_1 \mathbf{x}_i)) - \mathbf{W}_{d-1} \sigma_{d-2}(\dots \sigma_1(\mathbf{W}_1 \mathbf{x}'_i))\|_\infty \\ &\stackrel{(ii)}{\leq} M_{1,\infty}(d) L_{d-1} M_{1,\infty}(d-1) \|\sigma_{d-2}(\dots \sigma_1(\mathbf{W}_1 \mathbf{x}_i)) - \sigma_{d-2}(\dots \sigma_1(\mathbf{W}_1 \mathbf{x}'_i))\|_\infty \\ &\leq \prod_{i=1}^d M_{1,\infty}(i) \prod_{i=1}^{d-1} L_i \|\mathbf{x}_i - \mathbf{x}'_i\|_\infty \leq \prod_{i=1}^d M_{1,\infty}(i) \prod_{i=1}^{d-1} L_i \|\mathbf{x}_i - \mathbf{x}'_i\|, \end{aligned} \quad (63)$$

where (i) follows from the inequality that  $\mathbf{w}^T \mathbf{x} \leq \|\mathbf{w}\|_1 \|\mathbf{x}\|_\infty$  and (ii) follows from  $\mathbf{W}\mathbf{x} \leq \|\mathbf{W}\|_{1,\infty} \|\mathbf{x}\|_\infty$ . The remaining steps are the same as in the case when the parameter set is  $\mathcal{W}_F$ , and are omitted.

### C.3 Proof of Theorem 7

As commented in Section 3.4, directly applying the existing results on the Rademacher complexity of neural networks in [8] to unbounded sub-Gaussian inputs can lead to a loose upper bound. Hence,



here we use a different approach that takes advantage of the sub-Gaussianity of the input data. Our technique first upper-bounds the Rademacher complexity  $\mathbb{E}_{\epsilon, \mathbf{x}} \sup_{f \in \mathcal{F}_{nn}} |\sum_{i=1}^n \epsilon_i f(\mathbf{x}_i)/n|$  by

$$\sqrt{\lambda \log \left( \mathbb{E}_{\epsilon, \mathbf{x}} \sup_{f \in \mathcal{F}_{nn}} \exp \left( \lambda \left| \sum_{i=1}^n \epsilon_i f(\mathbf{x}_i)/n \right|^2 \right) \right)}, \quad (64)$$

and then upper-bounds the expectation term in (64) by combining a peeling method different from that in [8] and a tail bound of sub-Gaussian random vectors.

To prove Theorem 7, we first establish a useful lemma as follows.

**Lemma 4.** *For any input  $\mathbf{z} \in \mathbb{R}^t$ , let  $\sigma(\mathbf{z}) := [\sigma(z_1), \sigma(z_2), \dots, \sigma(z_t)]^T$ . Then, we have*

**(I)** *If the activation function  $\sigma(\cdot)$  is  $L$ -Lipchitz and satisfies  $\sigma(\alpha x) = \alpha \sigma(x)$  for all  $\alpha \geq 0$ , then for any vector-valued function class  $\mathcal{F}$  and any constant  $\eta > 0$ ,*

$$\mathbb{E}_{\mathbf{x}, \epsilon} \sup_{f \in \mathcal{F}, \|\mathbf{W}\|_F \leq R} \exp \left( \eta \left\| \sum_{i=1}^n \epsilon_i \sigma(\mathbf{W} f(\mathbf{x}_i)) \right\|^2 \right) \leq 2 \mathbb{E}_{\mathbf{x}, \epsilon} \sup_{f \in \mathcal{F}} \exp \left( \eta R^2 L^2 \left\| \sum_{i=1}^n \epsilon_i f(\mathbf{x}_i) \right\|^2 \right).$$

**(II)** *If the activation function  $\sigma(\cdot)$  is  $L$ -Lipchitz and satisfies  $\sigma(0) = 0$ , then for any vector-valued function class  $\mathcal{F}$  and any constant  $\eta > 0$ ,*

$$\mathbb{E}_{\mathbf{x}, \epsilon} \sup_{f \in \mathcal{F}, \|\mathbf{W}\|_{1, \infty} \leq R} \exp \left( \eta \left\| \sum_{i=1}^n \epsilon_i \sigma(\mathbf{W} f(\mathbf{x}_i)) \right\|_{\infty}^2 \right) \leq 2 \mathbb{E}_{\mathbf{x}, \epsilon} \sup_{f \in \mathcal{F}} \exp \left( \eta R^2 L^2 \left\| \sum_{i=1}^n \epsilon_i f(\mathbf{x}_i) \right\|_{\infty}^2 \right).$$

*Proof.* The proof of the first result follows the general idea of that of Lemma 1 in [8]. However, we cannot directly apply Lemma 1 in [8] because the function  $\exp(\eta x^2)$  is not increasing over entire  $\mathbb{R}$ . Thus, we need to tailor its proof to our setting.

Consider a function  $g : \mathbb{R} \mapsto (0, \infty)$  given by  $g(x) = \exp(\eta x^2) \mathbf{I}(x \geq 0) + \mathbf{I}(x < 0)$ , where  $\mathbf{I}(\cdot)$  is the indicator function. It can be verified that  $g(\cdot)$  is increasing and convex. Then, we have

$$\begin{aligned} \mathbb{E}_{\mathbf{x}, \epsilon} \sup_{f \in \mathcal{F}, \|\mathbf{W}\|_F \leq R} \exp \left( \eta \left\| \sum_{i=1}^n \epsilon_i \sigma(\mathbf{W} f(\mathbf{x}_i)) \right\|^2 \right) &= \mathbb{E}_{\mathbf{x}, \epsilon} \sup_{f \in \mathcal{F}, \|\mathbf{W}\|_F \leq R} g \left( \left\| \sum_{i=1}^n \epsilon_i \sigma(\mathbf{W} f(\mathbf{x}_i)) \right\|^2 \right) \\ &\stackrel{(i)}{=} \mathbb{E}_{\mathbf{x}, \epsilon} \sup_{f \in \mathcal{F}, \|\mathbf{w}\| \leq R} g \left( \left\| \sum_{i=1}^n \epsilon_i \sigma(\mathbf{w} f(\mathbf{x}_i)) \right\|^2 \right), \end{aligned} \quad (65)$$

where (i) follows from the second equation in the proof of Lemma 1 in [8]. Noting that  $g(x) \geq 0$ , we have  $g(|x|) \leq g(x) + g(-x)$ , and hence (65) is upper-bounded by

$$\mathbb{E}_{\mathbf{x}, \epsilon} \sup_{f \in \mathcal{F}, \|\mathbf{w}\| \leq R} g \left( \sum_{i=1}^n \epsilon_i \sigma(\mathbf{w} f(\mathbf{x}_i)) \right) + \mathbb{E}_{\mathbf{x}, \epsilon} \sup_{f \in \mathcal{F}, \|\mathbf{w}\| \leq R} g \left( - \sum_{i=1}^n \epsilon_i \sigma(\mathbf{w} f(\mathbf{x}_i)) \right),$$

which, using the symmetry of the distribution of the Rademacher random variable  $\epsilon_i$ , is equal to

$$2 \mathbb{E}_{\mathbf{x}, \epsilon} \sup_{f \in \mathcal{F}, \|\mathbf{w}\| \leq R} g \left( \sum_{i=1}^n \epsilon_i \sigma(\mathbf{w} f(\mathbf{x}_i)) \right). \quad (66)$$

Recall that  $g$  is increasing and convex and note that  $\sigma(0) = 0$ . Then, based on the equation (4.20)<sup>1</sup> in [12], we further upper-bound (66) by

$$2 \mathbb{E}_{\mathbf{x}, \epsilon} \sup_{f \in \mathcal{F}, \|\mathbf{w}\| \leq R} g \left( LR \left\| \sum_{i=1}^n \epsilon_i f(\mathbf{x}_i) \right\| \right) = 2 \mathbb{E}_{\mathbf{x}, \epsilon} \sup_{f \in \mathcal{F}} \exp \left( \eta R^2 L^2 \left\| \sum_{i=1}^n \epsilon_i f(\mathbf{x}_i) \right\|^2 \right). \quad (67)$$

The proof of the second result follows from that of Lemma 2 in [8].  $\square$

<sup>1</sup>Although this result requires  $\sigma(\cdot)$  to be 1-Lipchitz, it can be directly extended to any Lipchitz constant  $L > 0$  by replacing the Lipchitz constant 1 with  $L$  in its proof.

Next, we provide the main part of the proof.

**Case 1: parameter set  $\mathcal{W}_F$ .** Let  $F_i(\mathbf{x}) = \sigma_{i-1}(\mathbf{W}_{i-1}\sigma_{i-2}(\cdots\sigma_1(\mathbf{W}_1\mathbf{x})))$ . Then, for any  $\lambda > 0$ ,

$$\begin{aligned}
n\mathcal{R}_n(\mathcal{F}_{nn}, \mu) &= \mathbb{E}_{\mathbf{x}, \epsilon} \sup_{F_{d-1}, \mathbf{w}_d, \mathbf{W}_{d-1}} \left| \sum_{i=1}^n \epsilon_i \mathbf{w}_d^T \sigma_{d-1}(\mathbf{W}_{d-1} F_{d-1}(\mathbf{x}_i)) \right| \\
&= \sqrt{\frac{1}{\lambda} \log \left( \exp \lambda \left( \mathbb{E}_{\mathbf{x}, \epsilon} \sup_{F_{d-1}, \mathbf{w}_d, \mathbf{W}_{d-1}} \left| \sum_{i=1}^n \epsilon_i \mathbf{w}_d^T \sigma_{d-1}(\mathbf{W}_{d-1} F_{d-1}(\mathbf{x}_i)) \right|^2 \right) \right)} \\
&\stackrel{(i)}{\leq} \sqrt{\frac{1}{\lambda} \log \left( \mathbb{E}_{\mathbf{x}, \epsilon} \exp \left( \lambda \sup_{F_{d-1}, \mathbf{w}_d, \mathbf{W}_{d-1}} \left| \sum_{i=1}^n \epsilon_i \mathbf{w}_d^T \sigma_{d-1}(\mathbf{W}_{d-1} F_{d-1}(\mathbf{x}_i)) \right|^2 \right) \right)} \\
&\stackrel{(ii)}{=} \sqrt{\frac{1}{\lambda} \log \left( \mathbb{E}_{\mathbf{x}, \epsilon} \sup_{F_{d-1}, \mathbf{w}_d, \mathbf{W}_{d-1}} \exp \left( \lambda \left| \sum_{i=1}^n \epsilon_i \mathbf{w}_d^T \sigma_{d-1}(\mathbf{W}_{d-1} F_{d-1}(\mathbf{x}_i)) \right|^2 \right) \right)} \\
&\leq \sqrt{\frac{1}{\lambda} \log \left( \mathbb{E}_{\mathbf{x}, \epsilon} \sup_{F_{d-1}, \mathbf{W}_{d-1}} \exp \left( \lambda M_F(d)^2 \left\| \sum_{i=1}^n \epsilon_i \sigma_{d-1}(\mathbf{W}_{d-1} F_{d-1}(\mathbf{x}_i)) \right\|^2 \right) \right)} \\
&\stackrel{(iii)}{\leq} \sqrt{\frac{1}{\lambda} \log \left( \mathbb{E}_{\mathbf{x}, \epsilon} \sup_{F_{d-1}} \exp \left( \lambda M_F(d)^2 M_F(d-1)^2 L_{d-1}^2 \left\| \sum_{i=1}^n \epsilon_i F_{d-1}(\mathbf{x}_i) \right\|^2 \right) \right)}, \quad (68)
\end{aligned}$$

where (i) follows from Jensen's inequality, (ii) follows from the fact that the function  $\exp(\lambda x^2)$  is strictly increasing over  $[0, \infty]$  and (iii) follows from Lemma 4. Repeating the step (iii) in (68) for  $d-1$  times yields

$$n\mathcal{R}_n(\mathcal{F}_{nn}, \mu) \leq \sqrt{\frac{1}{\lambda} \log \left( 2^{d-1} \mathbb{E}_{\mathbf{x}, \epsilon} \left( e^{\lambda M^2 \|\sum_{i=1}^n \epsilon_i \mathbf{x}_i\|^2} \right) \right)}. \quad (69)$$

where we define  $M := \prod_{i=1}^d M_F(i) \prod_{i=1}^{d-1} L_i$ . Next, we upper-bound the following term from (69)

$$\mathbb{E}_{\mathbf{x}, \epsilon} \exp \left( \lambda M^2 \left\| \sum_{i=1}^n \epsilon_i \mathbf{x}_i \right\|^2 \right) = \mathbb{E}_{\epsilon} \left( \mathbb{E}_{\mathbf{x}} \exp \left( \lambda M^2 \left\| \sum_{i=1}^n \epsilon_i \mathbf{x}_i \right\|^2 \right) \middle| \epsilon_1, \dots, \epsilon_n \right) \quad (70)$$

Conditioned on  $\epsilon_1, \dots, \epsilon_n$ , we define  $\mathbf{z} = \sum_{i=1}^n \epsilon_i \mathbf{x}_i$ . Recall that each  $\mathbf{x}_i$  is a sub-Gaussian random vector with variance  $\tau^2$  and mean  $\mathbf{u}$ . Thus, we have, for any vector  $\mathbf{a} \in \mathbb{R}^h$ ,

$$\mathbb{E}_{\mathbf{z}} e^{\mathbf{a}^T (\mathbf{z} - \mathbb{E}\mathbf{z})} = \prod_{i=1}^n \mathbb{E}_{\mathbf{x}_i} e^{\mathbf{a}^T \epsilon_i (\mathbf{x}_i - \mathbb{E}\mathbf{x}_i)} \leq e^{\|\mathbf{a}\|^2 n \tau^2 / 2},$$

which implies that  $\mathbf{z}$  is a sub-Gaussian random vector with variance  $n\tau^2$  and mean  $\mathbf{u}_z = \mathbf{u} \sum_{i=1}^n \epsilon_i$ . Then, using Lemma 3 in the proof of Theorem 5, we obtain, for any  $0 \leq \lambda M^2 \leq 1/(2n\tau^2)$ ,

$$\begin{aligned}
\mathbb{E}_{\mathbf{z}} \exp(\lambda M^2 \|\mathbf{z}\|^2) &\leq \exp \left( n\tau^2 h \lambda M^2 + \frac{n^2 \tau^4 h \lambda^2 M^4 + \|\mathbf{u}_z\|^2 \lambda M^2}{1 - 2n\tau^2 \lambda M^2} \right) \\
&\stackrel{(i)}{\leq} \exp \left( n\tau^2 h \lambda M^2 + \frac{n^2 \tau^4 h \lambda^2 M^4}{1 - 2n\tau^2 \lambda M^2} \right) \exp \left( \frac{\Gamma_{\text{uB}}^2 \lambda M^2 |\sum_{i=1}^n \epsilon_i|^2}{1 - 2n\tau^2 \lambda M^2} \right),
\end{aligned}$$

where (i) follows from the fact that  $\|\mathbf{u}\|^2 \leq \Gamma_{\text{uB}}^2$ . Pick  $\lambda = (1 - 2n\tau^2 \lambda M^2)/(4\Gamma_{\text{uB}}^2 n M^2)$ . Then, we have  $\lambda M^2 \leq 1/(2n\tau^2)$ , and

$$\mathbb{E}_{\mathbf{z}} \exp(\lambda M^2 \|\mathbf{z}\|^2) \leq \exp \left( n\tau^2 h \lambda M^2 \left( 1 + \frac{\tau^2}{4\Gamma_{\text{uB}}^2} \right) \right) \exp \left( \frac{|\sum_{i=1}^n \epsilon_i|^2}{4n} \right),$$

which, in conjunction with (70), yields

$$\mathbb{E}_{\mathbf{x}, \epsilon} \exp \left( \lambda M^2 \left\| \sum_{i=1}^n \epsilon_i \mathbf{x}_i \right\|^2 \right) \leq \exp \left( n \tau^2 h \lambda M^2 \left( 1 + \frac{\tau^2}{4\Gamma_{\text{uB}}^2} \right) \right) \mathbb{E}_{\epsilon} \exp \left( \frac{\left| \sum_{i=1}^n \epsilon_i \right|^2}{4n} \right). \quad (71)$$

Based on the equation (1) in [17], we have

$$\mathbb{P} \left( \left| \sum_{i=1}^n \epsilon_i \right| \geq \sqrt{n} \delta \right) \leq 2e^{-\delta^2/2},$$

which implies that

$$\mathbb{P} \left( \exp \left( \frac{\left| \sum_{i=1}^n \epsilon_i \right|^2}{4n} \right) \geq \exp \left( \frac{\delta^2}{4} \right) \right) = \mathbb{P} \left( \left| \sum_{i=1}^n \epsilon_i \right| \geq \sqrt{n} \delta \right) \leq 2e^{-\delta^2/2}. \quad (72)$$

Defining a random variable  $\mathbf{Y} = \exp \left( \left| \sum_{i=1}^n \epsilon_i \right|^2 / (4n) \right)$ , and letting  $t = \exp(\delta^2/4) \geq 1$ , the inequality (72) can be rewritten as  $\mathbb{P}(\mathbf{Y} \geq t) \leq 2/t^2$ . Then, we can obtain

$$\mathbb{E}_{\epsilon} \exp \left( \frac{\left| \sum_{i=1}^n \epsilon_i \right|^2}{4n} \right) = \mathbb{E}(\mathbf{Y}) = \int_1^{\infty} \mathbb{P}(\mathbf{Y} \geq t) dt \leq \int_1^{\infty} \frac{2}{t^2} dt = 2,$$

which, combined with (71), implies that

$$\mathbb{E}_{\mathbf{x}, \epsilon} \exp \left( \lambda M^2 \left\| \sum_{i=1}^n \epsilon_i \mathbf{x}_i \right\|^2 \right) \leq 2 \exp \left( n \tau^2 h \lambda M^2 \left( 1 + \frac{\tau^2}{4\Gamma_{\text{uB}}^2} \right) \right). \quad (73)$$

Combining (69) and (73) and recalling that  $\lambda = 1/(4\Gamma_{\text{uB}}^2 n M^2 + 2n\tau^2 M^2)$ , we have

$$n\mathcal{R}_n(\mathcal{F}_{nn}, \mu) \leq \sqrt{n} \Gamma_{\text{uB}} M \sqrt{6d \log 2 + 5h/4},$$

which further yields

$$\mathcal{R}_n(\mathcal{F}_{nn}, \mu) \leq \frac{\Gamma_{\text{uB}} M \sqrt{6d \log 2 + 5h/4}}{\sqrt{n}}.$$

**Case 2: parameter set  $\mathcal{W}_{1,\infty}$ .** Using an approach similar to (68) and applying Lemma 4, we obtain, for any  $\lambda > 0$ ,

$$n\mathcal{R}_n(\mathcal{F}_{nn}, \mu) \leq \frac{1}{\lambda} \log \left( 2^{d-1} \mathbb{E}_{\mathbf{x}, \epsilon} \exp \left( \lambda M \left\| \sum_{i=1}^n \epsilon_i \mathbf{x}_i \right\|_{\infty} \right) \right), \quad (74)$$

where  $M = \prod_{i=1}^d M_{1,\infty}(i) \prod_{i=1}^{d-1} L_i$ . Letting  $x_{ij}$  be the  $j^{\text{th}}$  coordinate of  $\mathbf{x}_i$ , the expectation term in (74) can be rewritten as

$$\begin{aligned} \mathbb{E}_{\mathbf{x}, \epsilon} \exp \left( \lambda M \max_j \left| \sum_{i=1}^n \epsilon_i x_{ij} \right| \right) &\leq \sum_{j=1}^h \mathbb{E}_{\mathbf{x}, \epsilon} \exp \left( \lambda M \left| \sum_{i=1}^n \epsilon_i x_{ij} \right| \right) \\ &\leq \sum_{j=1}^h \mathbb{E}_{\mathbf{x}, \epsilon} \left( \exp \left( \lambda M \sum_{i=1}^n \epsilon_i x_{ij} \right) + \exp \left( -\lambda M \sum_{i=1}^n \epsilon_i x_{ij} \right) \right) \\ &= 2 \sum_{j=1}^h \mathbb{E}_{\mathbf{x}, \epsilon} \exp \left( \lambda M \sum_{i=1}^n \epsilon_i x_{ij} \right) \stackrel{(i)}{=} 2 \sum_{j=1}^h \mathbb{E}_{\epsilon} \left( \prod_{i=1}^n \mathbb{E}_{\mathbf{x}} \exp(\lambda M \epsilon_i x_{ij}) \mid \epsilon_1, \dots, \epsilon_n \right) \\ &\stackrel{(ii)}{\leq} 2 \sum_{j=1}^h \mathbb{E}_{\epsilon} \left( \prod_{i=1}^n \exp(M^2 \lambda^2 \tau^2 / 2) \right) = 2h \exp(\lambda^2 M^2 n \tau^2 / 2), \end{aligned} \quad (75)$$

where (i) follows from the fact that  $\mathbf{x}_1, \dots, \mathbf{x}_n$  are independent and (ii) follows from the definition of the sub-Gaussian random variable. Combining (74) and (75) yields

$$\begin{aligned} n\mathcal{R}_n(\mathcal{F}_{nn}, \mu) &\leq \frac{d \log 2 + \log h}{\lambda} + \lambda \frac{M^2 n \tau^2}{2} \stackrel{(i)}{=} M \tau \sqrt{2n} \sqrt{d \log 2 + \log h} \\ &\stackrel{(ii)}{\leq} M \Gamma_{\text{uB}} \sqrt{2n} \sqrt{d \log 2 + \log h}, \end{aligned}$$

where (i) is obtained by picking  $\lambda = \sqrt{2(d \log 2 + \log h)/(M^2 n \tau^2)}$  and (ii) follows from the fact that  $\tau \leq \Gamma_{\text{uB}}$ . Then, the proof is complete.

## D Proof of Theorem 4

The proof is similar to that of Theorem 6. First, we have

$$|d_{\mathcal{F}_{nn}}(\mu, \nu) - d_{\mathcal{F}_{nn}}(\hat{\mu}, \hat{\nu})| \leq F(\mathbf{x}_1, \dots, \mathbf{x}_n, \mathbf{y}_1, \dots, \mathbf{y}_m).$$

where the function  $F$  is defined in (55). We start with the case when the parameter set is  $\mathcal{W}_F$ , and then adapt the proof to the parameter set  $\mathcal{W}_{1,\infty}$ .

**Case 1: parameter set  $\mathcal{W}_F$ .** Using an approach similar to (58) and (59), we can obtain,

$$\begin{aligned} |F(\dots, \mathbf{x}_i, \dots) - F(\dots, \mathbf{x}'_i, \dots)| &\leq \prod_{i=1}^d M_F(i) \prod_{i=1}^{d-1} L_i \|\mathbf{x}_i - \mathbf{x}'_i\|/n \leq 2\Gamma_B \prod_{i=1}^d M_F(i) \prod_{i=1}^{d-1} L_i/n \\ |F(\dots, \mathbf{y}_i, \dots) - F(\dots, \mathbf{y}'_i, \dots)| &\leq \prod_{i=1}^d M_F(i) \prod_{i=1}^{d-1} L_i \|\mathbf{y}_i - \mathbf{y}'_i\|/m \leq 2\Gamma_B \prod_{i=1}^d M_F(i) \prod_{i=1}^{d-1} L_i/m, \end{aligned}$$

which, using the standard McDiarmid inequality [16], implies

$$\mathbb{P}(F(\mathbf{x}_1, \dots, \mathbf{x}_n, \dots, \mathbf{y}_m) - \mathbb{E} F(\mathbf{x}_1, \dots, \mathbf{x}_n, \dots, \mathbf{y}_m) \geq \epsilon) \leq \exp\left(\frac{-\epsilon^2 mn}{2K^2(m+n)}\right) \quad (76)$$

where  $K := \Gamma_B \prod_{i=1}^d M_F(i) \prod_{i=1}^{d-1} L_i$ . In order to upper-bound the expectation term in (76), using an approach similar to (62) yields

$$\mathbb{E} F(\mathbf{x}_1, \dots, \mathbf{x}_n, \dots, \mathbf{y}_m) \leq 2\mathcal{R}_n(\mathcal{F}_{nn}, \mu) + 2\mathcal{R}_m(\mathcal{F}_{nn}, \nu). \quad (77)$$

Let  $\delta = \exp(-\epsilon^2 mn/(2K^2(m+n)))$ . Combining (76) and (77) implies that, with probability at least  $1 - \delta$ ,

$$\begin{aligned} F(\mathbf{x}_1, \dots, \mathbf{x}_n, \dots, \mathbf{y}_m) &\leq 2\mathcal{R}_n(\mathcal{F}_{nn}, \mu) + 2\mathcal{R}_m(\mathcal{F}_{nn}, \nu) \\ &\quad + \Gamma_B \prod_{i=1}^d M_F(i) \prod_{i=1}^{d-1} L_i \sqrt{2 \log \frac{1}{\delta}} \sqrt{\frac{1}{n} + \frac{1}{m}}, \end{aligned} \quad (78)$$

where the Rademacher complexity

$$\mathcal{R}_n(\mathcal{F}_{nn}, \mu) = \mathbb{E}_{\mathbf{x}, \epsilon} \sup_{f \in \mathcal{F}_{nn}} \left| \frac{1}{n} \sum_{i=1}^n \epsilon_i f(\mathbf{x}_i) \right| = \mathbb{E}_{\mathbf{x}} \left( \mathbb{E}_{\epsilon} \left( \sup_{f \in \mathcal{F}_{nn}} \left| \frac{1}{n} \sum_{i=1}^n \epsilon_i f(\mathbf{x}_i) \right| \right) \middle| \mathbf{x}_1, \dots, \mathbf{x}_n \right). \quad (79)$$

Conditioned on  $\mathbf{x}_1, \dots, \mathbf{x}_n$ , we define

$$\hat{\mathcal{R}}_n(\mathcal{F}_{nn}) = \mathbb{E}_{\epsilon} \sup_{f \in \mathcal{F}_{nn}} \left| \frac{1}{n} \sum_{i=1}^n \epsilon_i f(\mathbf{x}_i) \right|.$$

Let  $F_i(\mathbf{x}) = \sigma_{i-1}(\mathbf{W}_{i-1} \sigma_{i-2}(\dots \sigma_1(\mathbf{W}_1 \mathbf{x})))$ . Then, we can obtain

$$\begin{aligned} n\hat{\mathcal{R}}_n(\mathcal{F}_{nn}) &= \mathbb{E}_{\epsilon} \sup_{F_{d-1}, \mathbf{w}_d, \mathbf{W}_{d-1}} \left| \sum_{i=1}^n \epsilon_i \mathbf{w}_d^T \sigma_{d-1}(\mathbf{W}_{d-1} F_{d-1}(\mathbf{x}_i)) \right| \\ &= \frac{1}{\lambda} \log \left( \exp \lambda \left( \mathbb{E}_{\epsilon} \sup_{F_{d-1}, \mathbf{w}_d, \mathbf{W}_{d-1}} \left| \sum_{i=1}^n \epsilon_i \mathbf{w}_d^T \sigma_{d-1}(\mathbf{W}_{d-1} F_{d-1}(\mathbf{x}_i)) \right| \right) \right) \\ &\stackrel{(i)}{\leq} \frac{1}{\lambda} \log \left( \mathbb{E}_{\epsilon} \sup_{F_{d-1}, \mathbf{w}_d, \mathbf{W}_{d-1}} \exp \lambda \left( \left| \sum_{i=1}^n \epsilon_i \mathbf{w}_d^T \sigma_{d-1}(\mathbf{W}_{d-1} F_{d-1}(\mathbf{x}_i)) \right| \right) \right) \\ &\leq \frac{1}{\lambda} \log \left( \mathbb{E}_{\epsilon} \sup_{F_{d-1}, \mathbf{W}_{d-1}} \exp \lambda \left( M_F(d) \left\| \sum_{i=1}^n \epsilon_i \sigma_{d-1}(\mathbf{W}_{d-1} F_{d-1}(\mathbf{x}_i)) \right\| \right) \right). \end{aligned} \quad (80)$$

where (i) follows from the Jensen's inequality. Recall that  $\|\mathbf{x}_i\| \leq \Gamma_B$  for  $i = 1, 2, \dots, n$ . Then, combining (80) and the steps of the proof of Theorem 1 in [8] yields

$$\hat{\mathcal{R}}_n(\mathcal{F}_{nn}) \leq \frac{\Gamma_B \prod_{i=1}^d M_F(i) \prod_{i=1}^{d-1} L_i (\sqrt{2d \log 2} + 1)}{\sqrt{n}},$$

which, in conjunction with (78) and (79), yields the first result of Theorem 4.

**Case 2: parameter set  $\mathcal{W}_{1,\infty}$ .** Using an approach similar to (78), we can obtain

$$\begin{aligned} F(\mathbf{x}_1, \dots, \mathbf{x}_n, \dots, \mathbf{y}_m) &\leq 2\mathcal{R}_n(\mathcal{F}_{nn}, \mu) + 2\mathcal{R}_m(\mathcal{F}_{nn}, \nu) \\ &\quad + \Gamma_B \prod_{i=1}^d M_{1,\infty}(i) \prod_{i=1}^{d-1} L_i \sqrt{2 \log \frac{1}{\delta}} \sqrt{\frac{1}{n} + \frac{1}{m}}, \end{aligned} \quad (81)$$

Then, similarly to the proof of Theorem 2 in [8], we can obtain

$$\hat{\mathcal{R}}_n(\mathcal{F}_{nn}) \leq \frac{2\Gamma_B \prod_{i=1}^d M_{1,\infty}(i) \prod_{i=1}^{d-1} L_i \sqrt{d+1 + \log h}}{\sqrt{n}},$$

which, in conjunction with (81), implies the second result of Theorem 4.
